# Supplementary material for: Developmental differences in the intestinal microbiota of Chinese 1-year-old infants and 4-year-old children
Source: PubMed Central journal article supplement (PMC7656257; doi:10.1038/s41598-020-76591-4), 2020-11-10
Supplement: 41598_2020_76591_MOESM1_ESM.pdf [file 41598_2020_76591_MOESM1_ESM.pdf]

## Supplementary Information

# Developmental differences in the Intestinal Microbiota of Chinese 1-year-old Infants and 4-year-old children

**Min Guo<sup>1†</sup>, Maohua Miao<sup>1†</sup>, Yuezhu Wang<sup>2</sup>, Mengmeng Duan<sup>1</sup>, Fen Yang<sup>1</sup>, Yao Chen<sup>1</sup>, Wei Yuan<sup>1\*</sup>, Huajun Zheng<sup>1\*</sup>**

1. NHC Key Laboratory of Reproduction Regulation (Shanghai Institute of Planned Parenthood Research), Fudan University, Shanghai, 200032, China.

2. Shanghai-MOST Key Laboratory of Health and Disease Genomics, Chinese National Human Genome Center at Shanghai, Shanghai, 201203, China.

†These authors contributed equally to this work

\*corresponding author

Wei Yuan, [yuanwei11@yahoo.com](mailto:yuanwei11@yahoo.com)

Huajun Zheng, [zhenghj@chgc.sh.cn](mailto:zhenghj@chgc.sh.cn)

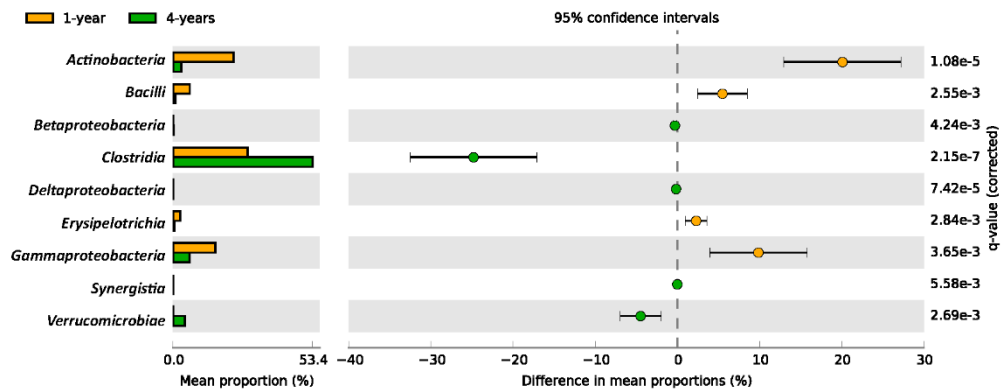

**Figure S1. Significant difference of gut microbiota between 1-year and 4-years old children at class level.**

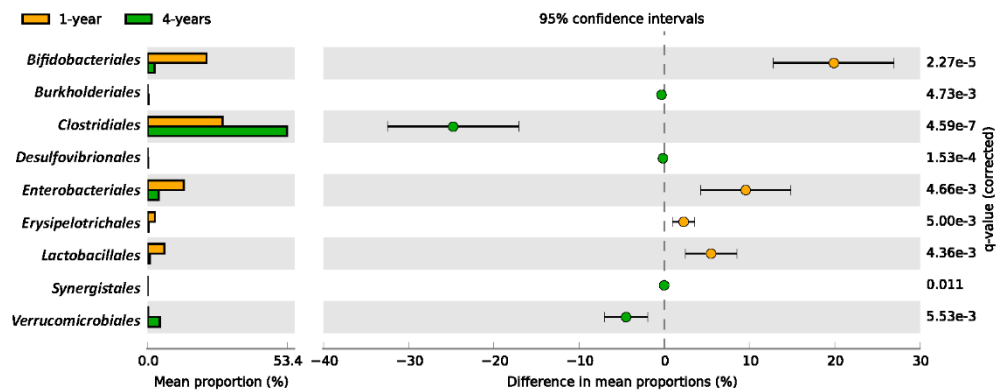

**Figure S2. Significant difference of gut microbiota between 1-year and 4-years old children at order level.**

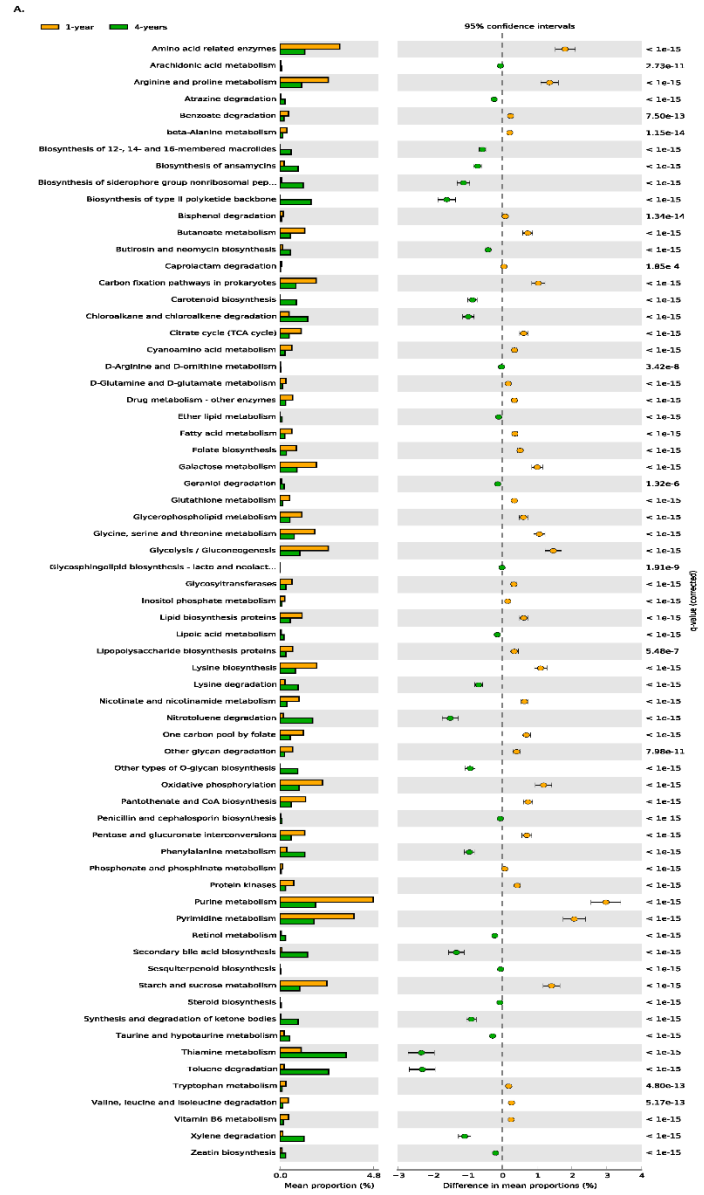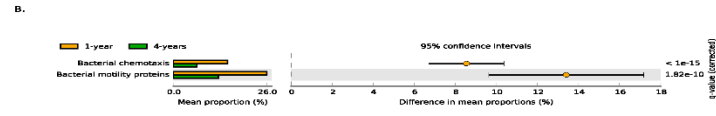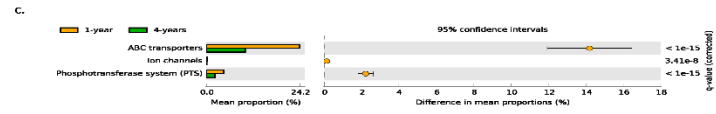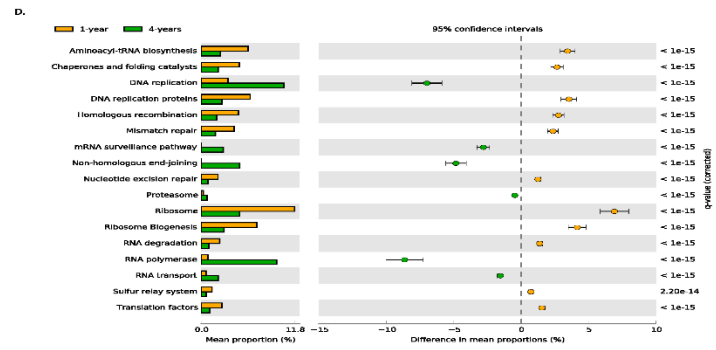

**Figure S3: Significantly different pathways based on PICRUSt prediction. A: metabolism, B: Cellular Processes, C: Environmental Information Processing, D: Genetic Information Processing.**

**Table S1. Dominant species and significant differences between 1-year old and 4-years old children.**

| species                                  | taxonomy                                                                                            | 1-year:<br>mean<br>rel.<br>freq.<br>(%) | 1-year:<br>std.<br>dev.<br>(%) | 4-<br>years:<br>mean<br>rel.<br>freq.<br>(%) | 4-<br>years:<br>std.<br>dev.<br>(%) | q-<br>values | enriched<br>in |
|------------------------------------------|-----------------------------------------------------------------------------------------------------|-----------------------------------------|--------------------------------|----------------------------------------------|-------------------------------------|--------------|----------------|
| <i>Akkermansia muciniphila</i>           | <i>Verrucomicrobia;Verrucomicrobiae;Verrucomicrobiales;Verrucomicrobiaceae; Akkermansia</i>         | 0.1365                                  | 0.7081                         | 4.2467                                       | 12.5290                             | 0.0006       | 4-years        |
| <i>Bacteroides uniformis</i>             | <i>Bacteroidetes;Bacteroidia;Bacteroidales;Bacteroidaceae;Bacteroides</i>                           | 0.7229                                  | 2.1046                         | 2.3728                                       | 4.8382                              | 0.0015       | 4-years        |
| <i>Bacteroides xylanisolvens</i>         | <i>Bacteroidetes;Bacteroidia;Bacteroidales;Bacteroidaceae;Bacteroides</i>                           | 0.2455                                  | 0.7294                         | 0.9195                                       | 2.5747                              | 0.0036       | 4-years        |
| <i>Bifidobacterium breve</i>             | <i>Actinobacteria;Actinobacteria;Bifidobacteriales;Bifidobacteriaceae;Bifidobacterium</i>           | 5.4473                                  | 13.5277                        | 0.0833                                       | 0.4174                              | 0.0038       | 1-year         |
| <i>Bifidobacterium longum</i>            | <i>Actinobacteria;Actinobacteria;Bifidobacteriales;Bifidobacteriaceae;Bifidobacterium</i>           | 8.7024                                  | 13.6215                        | 0.7241                                       | 1.8352                              | 0.0006       | 1-year         |
| <i>Bifidobacterium pseudocatenulatum</i> | <i>Actinobacteria;Actinobacteria;Bifidobacteriales;Bifidobacteriaceae;Bifidobacterium</i>           | 3.6506                                  | 7.2775                         | 1.1687                                       | 2.8872                              | 0.0084       | 1-year         |
| <i>Blautia wexlerae</i>                  | <i>Firmicutes;Clostridia;Clostridiales;Lachnospiraceae;Blautia</i>                                  | 2.7893                                  | 3.5496                         | 1.1586                                       | 1.6920                              | 0.0024       | 1-year         |
| <i>Dialister invisus</i>                 | <i>Firmicutes;Negativicutes;Selenomonadales;Veillonellaceae;Dialister</i>                           | 0.4723                                  | 2.8018                         | 4.3975                                       | 10.1129                             | 0.0004       | 4-years        |
| <i>Escherichia coli</i>                  | <i>Proteobacteria;Gammaproteobacteria;Enterobacteriales;Enterobacteriaceae;Escherichia/Shigella</i> | 11.8918                                 | 14.1779                        | 3.8256                                       | 10.3291                             | 0.0010       | 1-year         |
| <i>Faecalibacterium</i>                  | <i>Firmicutes;Clostridia;Clostridiales;Ruminococcaceae;Faecalibacterium</i>                         | 2.4346                                  | 4.7598                         | 9.3919                                       | 12.6895                             | 0.0000       | 4-years        |

|                              |                                                                                   |        |        |        |        |        |         |  |  |
|------------------------------|-----------------------------------------------------------------------------------|--------|--------|--------|--------|--------|---------|--|--|
| <i>prausnitzii</i>           |                                                                                   |        |        |        |        |        |         |  |  |
| <i>Fusicatenibacter</i>      | <i>Firmicutes; Clostridia; Clostridiales; Lachnospiraceae; Fusicatenibacter</i>   | 0.8787 | 1.6513 | 0.5529 | 1.0605 | 0.0425 | 1-year  |  |  |
| <i>saccharivorans</i>        |                                                                                   |        |        |        |        |        |         |  |  |
| <i>Gemmiger formicilis</i>   | <i>Firmicutes; Clostridia; Clostridiales; Lachnospiraceae; Fusicatenibacter</i>   | 0.3705 | 1.6513 | 1.4567 | 1.0605 | 0.0038 | 4-years |  |  |
| <i>Romboutsia timonensis</i> | <i>Firmicutes; Clostridia; Clostridiales; Peptostreptococcaceae; Romboutsia</i>   | 1.5681 | 2.8120 | 0.3818 | 1.9485 | 0.0038 | 1-year  |  |  |
| <i>Roseburia faecis</i>      | <i>Firmicutes; Clostridia; Clostridiales; Lachnospiraceae; Roseburia</i>          | 0.2633 | 1.2861 | 1.9782 | 5.0183 | 0.0007 | 4-years |  |  |
| <i>Roseburia</i>             | <i>Firmicutes; Clostridia; Clostridiales; Lachnospiraceae; Roseburia</i>          | 0.1667 | 0.6603 | 1.5116 | 5.6367 | 0.0037 | 4-years |  |  |
| <i>inulinivorans</i>         |                                                                                   |        |        |        |        |        |         |  |  |
| <i>Ruminococcus bromii</i>   | <i>Firmicutes; Clostridia; Clostridiales; Ruminococcaceae; Ruminococcus</i>       | 0.7746 | 2.1357 | 1.7286 | 5.1271 | 0.0200 | 4-years |  |  |
| <i>Ruminococcus gnavus</i>   | <i>Firmicutes; Clostridia; Clostridiales; Lachnospiraceae; Mediterraneibacter</i> | 4.5545 | 5.7721 | 2.1977 | 5.5324 | 0.0060 | 1-year  |  |  |
| <i>Streptococcus</i>         | <i>Firmicutes; Bacilli; Lactobacillales; Streptococcaceae; Streptococcus</i>      | 2.9009 | 5.1649 | 0.5903 | 1.0974 | 0.0024 | 1-year  |  |  |
| <i>salivarius</i>            |                                                                                   |        |        |        |        |        |         |  |  |
| <i>Veillonella dispar</i>    | <i>Firmicutes; Negativicutes; Selenomonadales; Veillonellaceae; Veillonella</i>   | 3.6217 | 5.0458 | 0.8911 | 3.3873 | 0.0011 | 1-year  |  |  |
